# Supplementary material for: The rational development of CD5-targeting biepitopic CARs with fully human heavy-chain-only antigen recognition domains
Source: PubMed Central journal article supplement (PMC8417515; doi:10.1016/j.ymthe.2021.07.001), 2021-07-16
Supplement: mmc1.pdf [file mmc1.pdf]

YMTHE, Volume 29

## **Supplemental Information**

### **The rational development of CD5-targeting bipepitopic CARs with fully human heavy-chain-only antigen recognition domains**

**Zhenyu Dai, Wei Mu, Ya Zhao, Xiangyin Jia, Jianwei Liu, Qiaoe Wei, Taochao Tan, and Jianfeng Zhou**

A

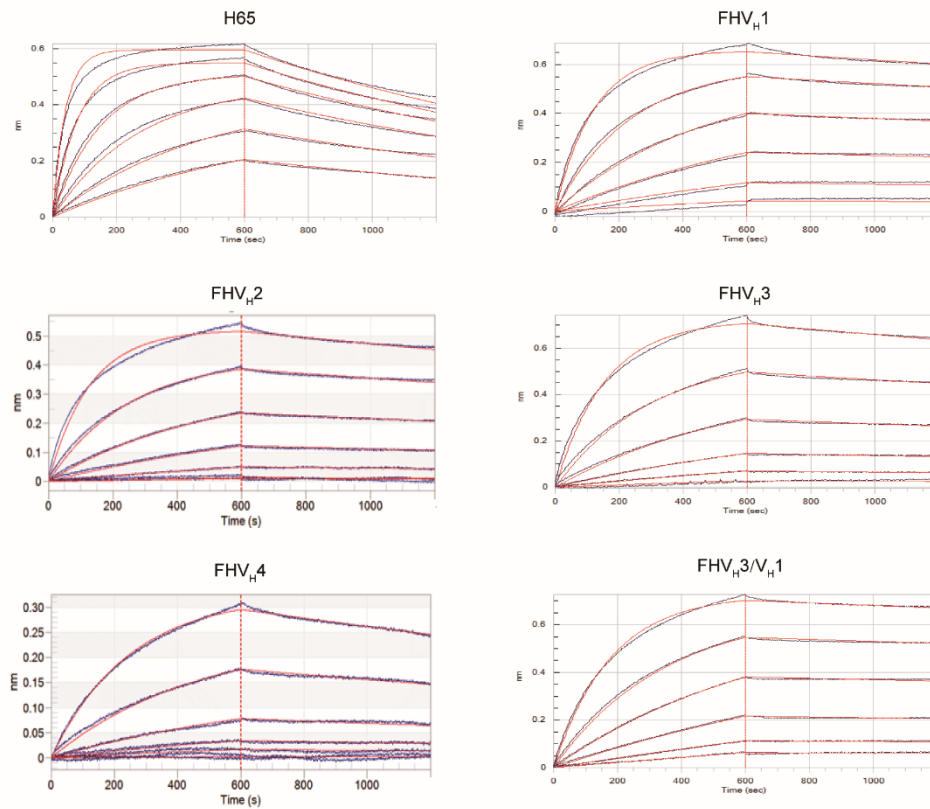

B

| Analyte                             | $K_D$ (M) | $K_{on}$ (1/Ms) | $K_{dis}$ (1/s) |
|-------------------------------------|-----------|-----------------|-----------------|
| H65                                 | 6.53E-10  | 9.82E+05        | 6.42E-04        |
| FHV <sub>H</sub> 1                  | 1.63E-09  | 8.15E+04        | 1.33E-04        |
| FHV <sub>H</sub> 2                  | 8.32E-09  | 2.55E+04        | 2.12E-04        |
| FHV <sub>H</sub> 3                  | 1.39E-09  | 1.27E+05        | 1.75E-04        |
| FHV <sub>H</sub> 4                  | 2.47E-08  | 1.25E+04        | 3.09E-04        |
| FHV <sub>H</sub> 3/V <sub>H</sub> 1 | 7.01E-10  | 1.12E+05        | 7.83E-05        |

**Supplementary Figure 1. The binding affinity measurement of FHV<sub>H</sub>1, FHV<sub>H</sub>3, FHV<sub>H</sub>4, FHV<sub>H</sub>3/V<sub>H</sub>1, and H65 antibodies to CD5 antigen. A, The affinity between H65, anti-CD5 V<sub>H</sub> domains, biepitopic FHV<sub>H</sub>3/V<sub>H</sub>1, and recombinant human CD5 was determined using bio-layer interferometry. CD5 antibodies were evaluated in human IgG1 format. B, Tabulated kinetic and equilibrium dissociation constants ( $K_D$ 's) of CD5 antibodies.**

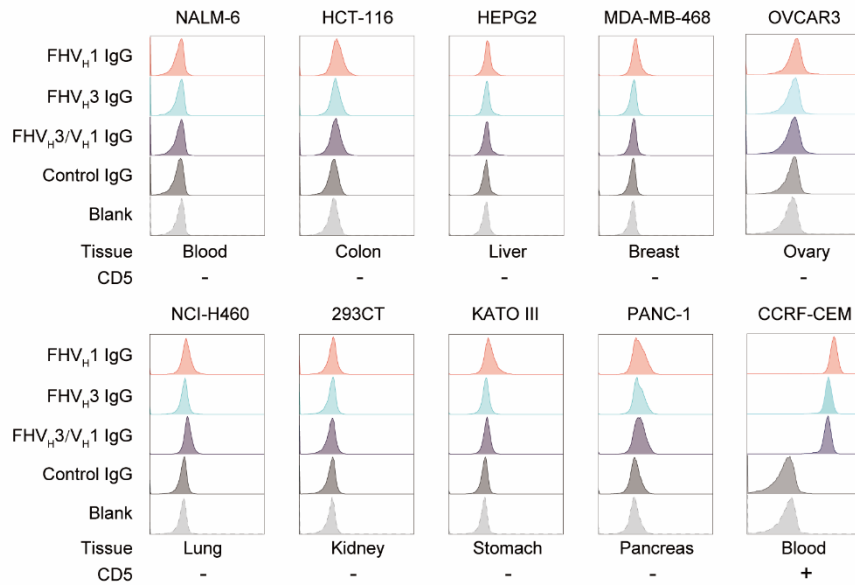

**Supplementary Figure 2. Binding test of CD5 antibodies to CD5<sup>-</sup> cell lines of different tissue origins.** CD5<sup>-</sup> cell lines of different tissue origins and CD5<sup>+</sup> CCRF-CEM cells as positive control were stained with H65-rFc, FHV<sub>H1</sub>-rFc, FHV<sub>H3</sub>-rFc, and FHV<sub>H3</sub>/V<sub>H1</sub>-rFc antibodies, followed by PE-conjugated anti-rabbit IgG antibody (clone: Poly4064), then analyzed using flow cytometry.

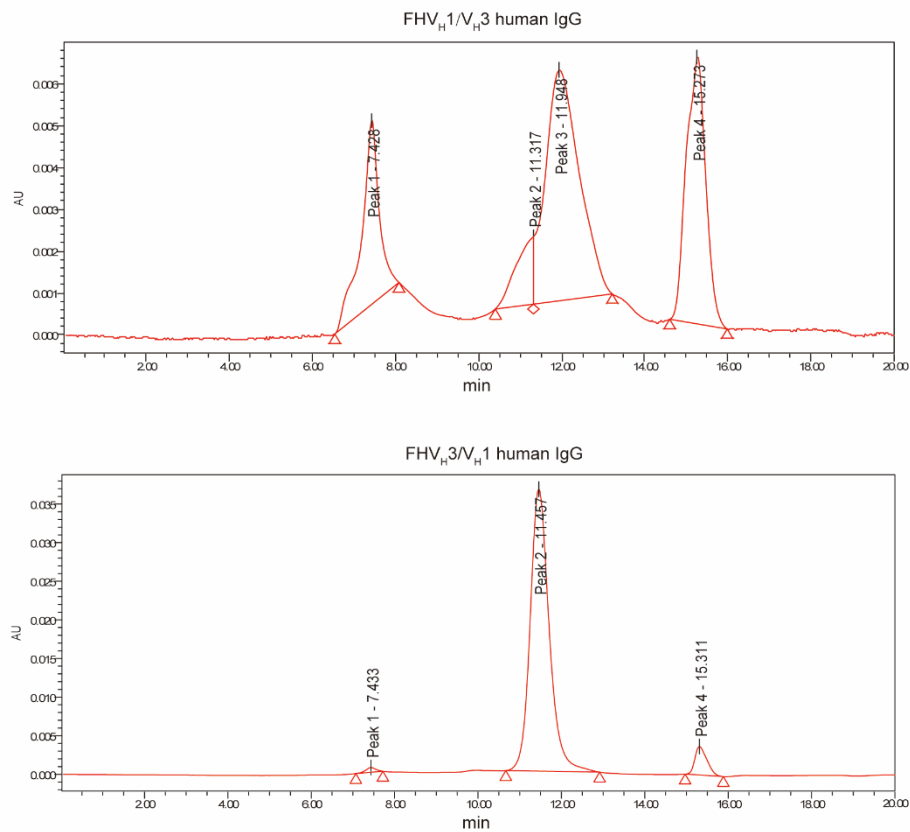

**Supplementary Figure 3. Representative size exclusion high-performance liquid chromatography (SEC-HPLC) elution chromatograms of purified CD5 biepitopic antibodies.** SEC-HPLC analysis of CD5 biepitopic antibodies, including monomers, aggregates, and fragments, was performed to explore possible reasons for the non-specificity of FHV<sub>H</sub>1/V<sub>H</sub>3-hFc antibody.

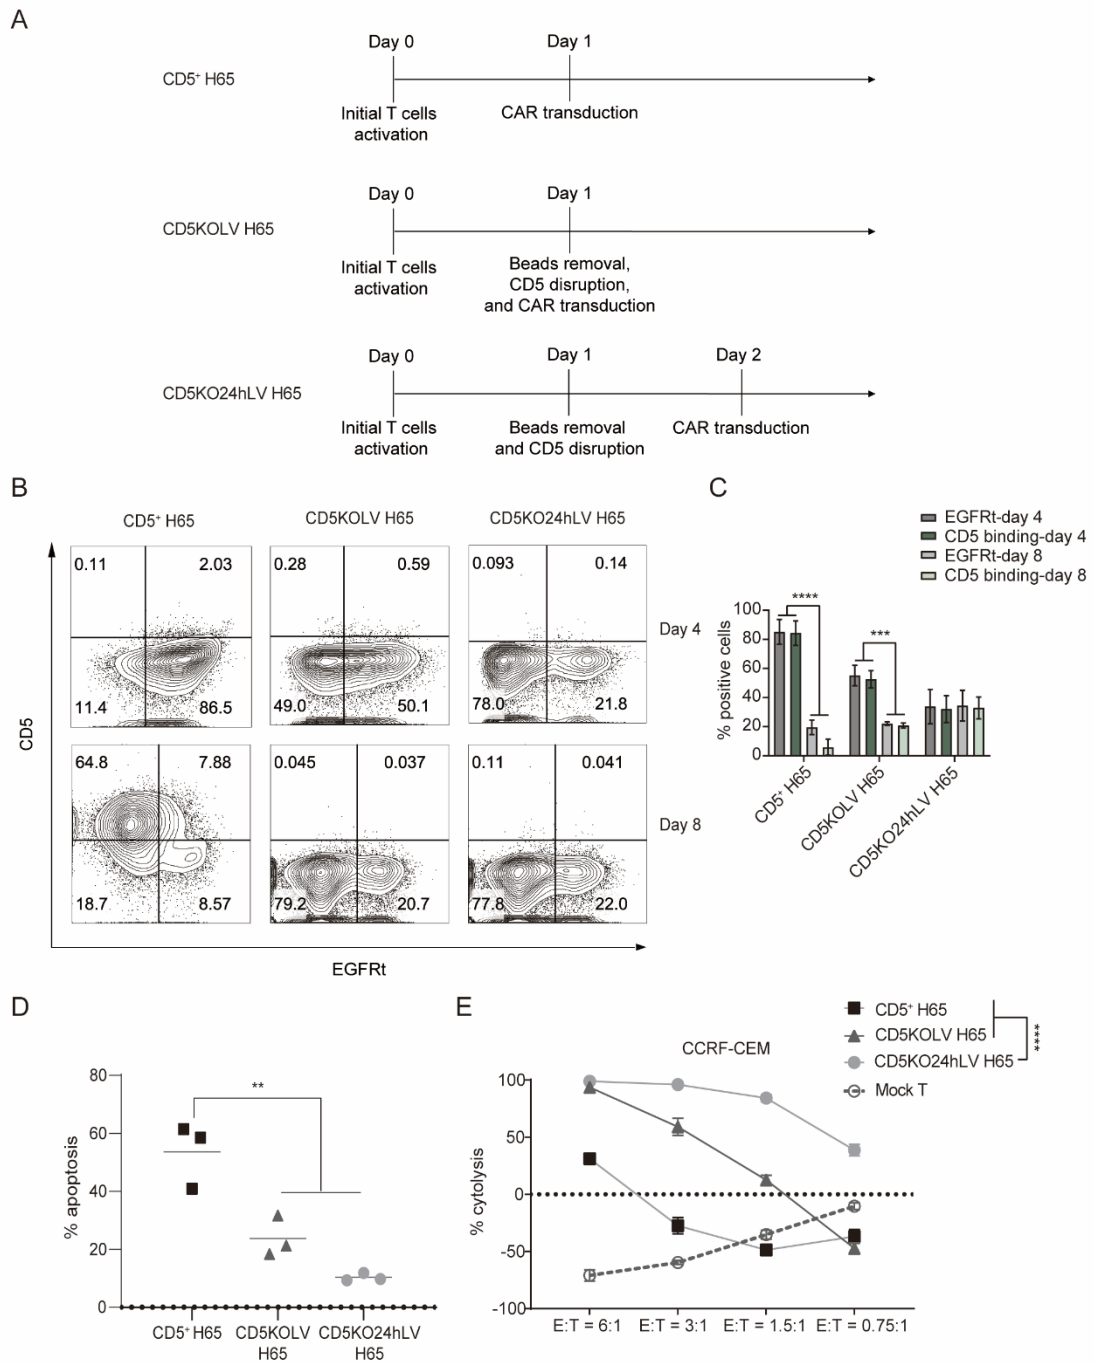

**Supplementary Figure 4. Process optimization of CD5KO and lentiviral transduction eliminate fratricide of H65 CAR-T cells.** **A**, Schematic representation of 3 different strategies to generate CD5KO anti-CD5 CAR-T cells. **B**, Representative results showed CD5 expression and EGFR expression of CAR-T cells on days 4 and

8, respectively, after H65 CAR lentivirus transduction through fluorescent-activated cell sorting (FACS). **C**, CAR expression in H65 CAR-T cells measured by EGFR antibody and CD5 antigen on days 4 and 8, respectively. The data represent mean  $\pm$  SD ( $n = 3$ ). \*\*\* $P < 0.001$ , \*\*\*\* $P < 0.0001$  (two-way ANOVA). **D**, Basal apoptosis of CD5<sup>+</sup> T cells transduced with H65 CAR lentivirus, T cells transduced with H65 CAR lentivirus immediately after CD5 knockout, and T cells transduced with anti-CD5 CAR lentivirus 24 h after CD5 knockout. Apoptosis was measured using annexin V and PI staining 10 days post-transduction (gated on EGFR<sup>+</sup> cells). The data represent mean  $\pm$  SD ( $n = 3$ ). \*\* $P < 0.01$  (one-way ANOVA). **E**, Cytotoxicity of CAR-T/T cells to CD5<sup>+</sup> CCRF-CEM was determined by luciferase-based cytotoxicity assay after 24 h incubated with target cells at different E:T ratios. The data indicates mean  $\pm$  SD from three co-cultures. \*\*\*\* $P < 0.0001$  (two-way ANOVA).

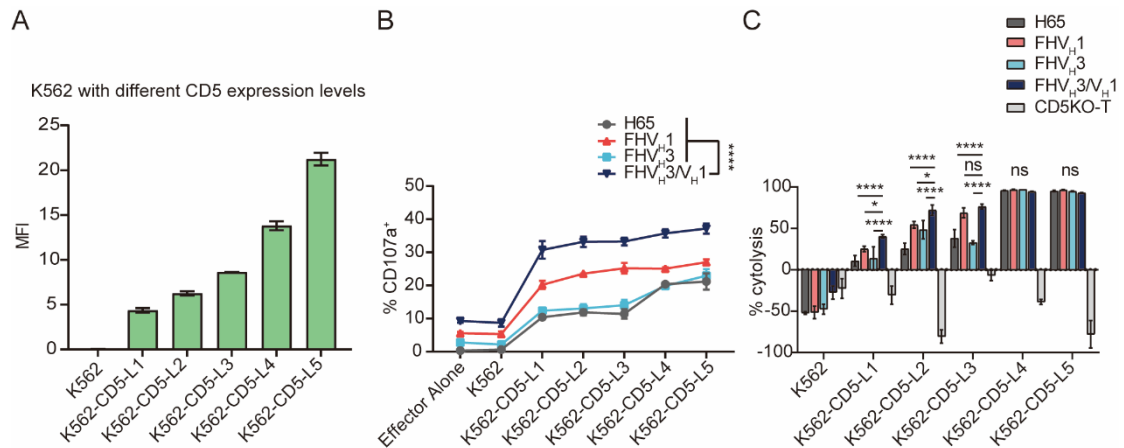

**Supplementary Figure 5. Biepitopic FHV<sub>H3</sub>/V<sub>H1</sub> CAR-T cells exhibited higher levels of degranulation and greater cytotoxicity with relatively low levels of CD5 antigen stimulation.** **A**, Expression of CD5 antigen on the surface of K562 and K562-CD5 L1–5 as determined using flow cytometry after staining with APC-conjugated CD5 antibody. The data represent mean  $\pm$  SD ( $n = 3$ ). **B**, Degranulation assay of H65, FHV<sub>H1</sub>, FHV<sub>H3</sub>, and FHV<sub>H3</sub>/V<sub>H1</sub> CAR-T cells after stimulation by K562 and K562-CD5 L1–5 at an E:T ratio of 10:1 for 4 h (gated on EGFR<sup>+</sup>CD8<sup>+</sup> cells). The data represent mean  $\pm$  SD ( $n = 3$ ). \*\*\*\* $P < 0.0001$  (two-way ANOVA). **C**, Cytotoxicity of CAR-T/T cells to K562 and K562-CD5 L1–5 was determined by luciferase-based cytotoxicity assay after 24 h incubated with target cells at an E:T ratio of 3:1. The data indicates mean  $\pm$  SD from three co-cultures. Not significant (ns), \* $P < 0.05$ , \*\*\*\* $P < 0.0001$  (two-way ANOVA).

A

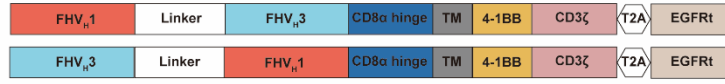

Linker = i. (EAAAK) × 1 ii. (EAAAK) × 3 iii. (GGGGS) × 1 iv. (GGGGS) × 3

B

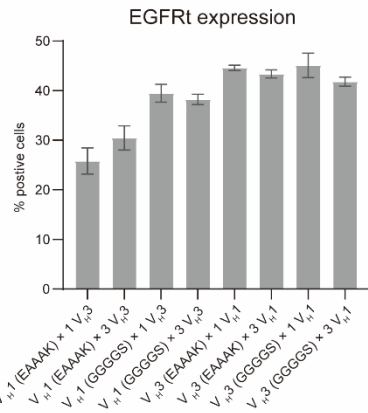

C

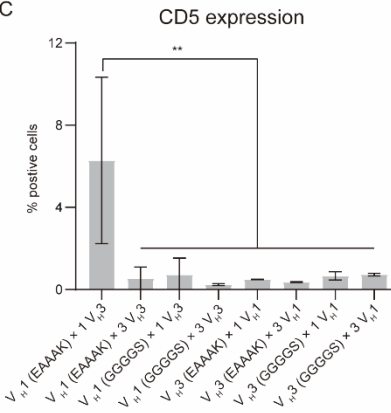

D

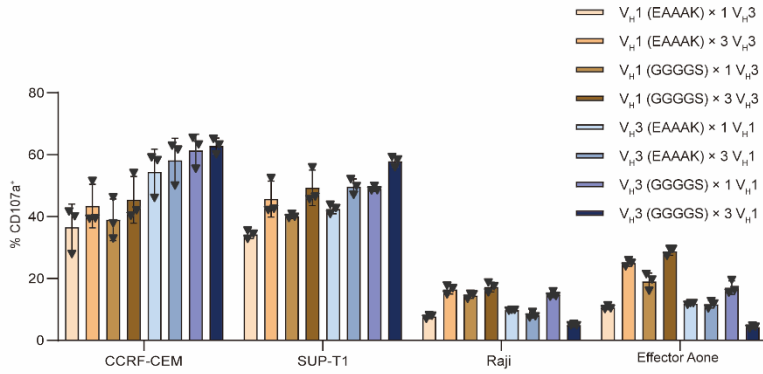

E

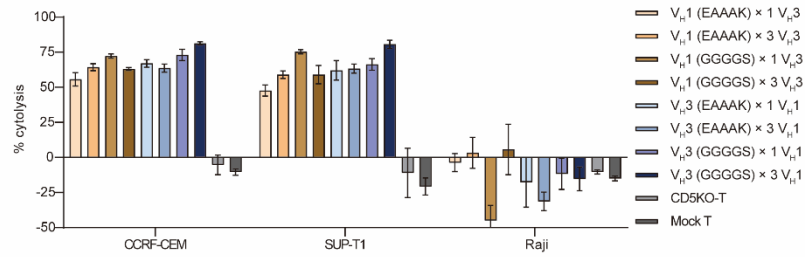

F

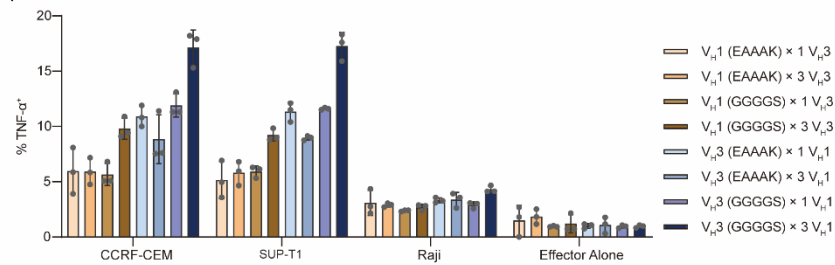

G

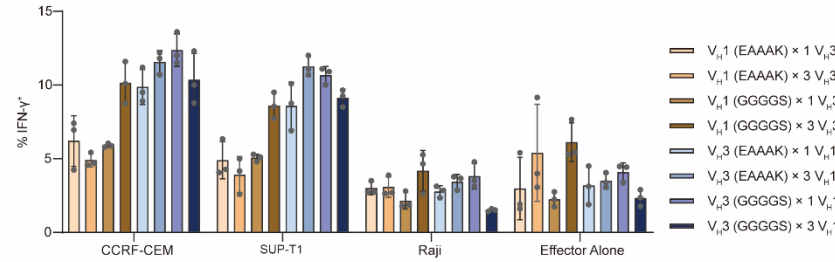



**Supplementary Figure 6. Functional comparisons of tandem V<sub>H</sub> CARs used either linkers of different sizes, flexibilities, and amino acid compositions or V<sub>H</sub> domains connected in different orders (V<sub>H1</sub>-V<sub>H3</sub> or V<sub>H3</sub>-V<sub>H1</sub>).** **A**, Schematic diagram of the lentiviral vectors encoding the tandem CAR constructs consisting of FHV<sub>H1</sub> and FHV<sub>H3</sub>. **B**, The CAR expression levels of tandem CAR constructs measured by EGFR antibody (clone: AY13) on day 10. The results are displayed as mean ± SD (*n* = 3). **C**, Flow cytometry analysis of CD5 antigen expression on the surface of tandem CAR-T cells on day 10. The results are displayed as mean ± SD (*n* = 3). \*\**P* < 0.01 (one-way ANOVA). **D**, The degranulation assay of indicated CAR constructs T cells. The results are displayed as mean ± SD (*n* = 3). **E**, Target-cell lysis activity of tandem CARs determined by luciferase-based cytotoxicity assay after 24 h incubated with target cells at an E:T ratio of 1:1. Reported values are the mean ± SD of triplicates. **F**, Representative flow cytometry analysis showing intracellular cytokine staining for pro-inflammatory cytokines (TNF-α and IFN-γ) after tandem CAR-T cells co-cultured with indicated target cells at an E:T ratio of 1:1 for 5 h. The results are displayed as mean ± SD (*n* = 3).

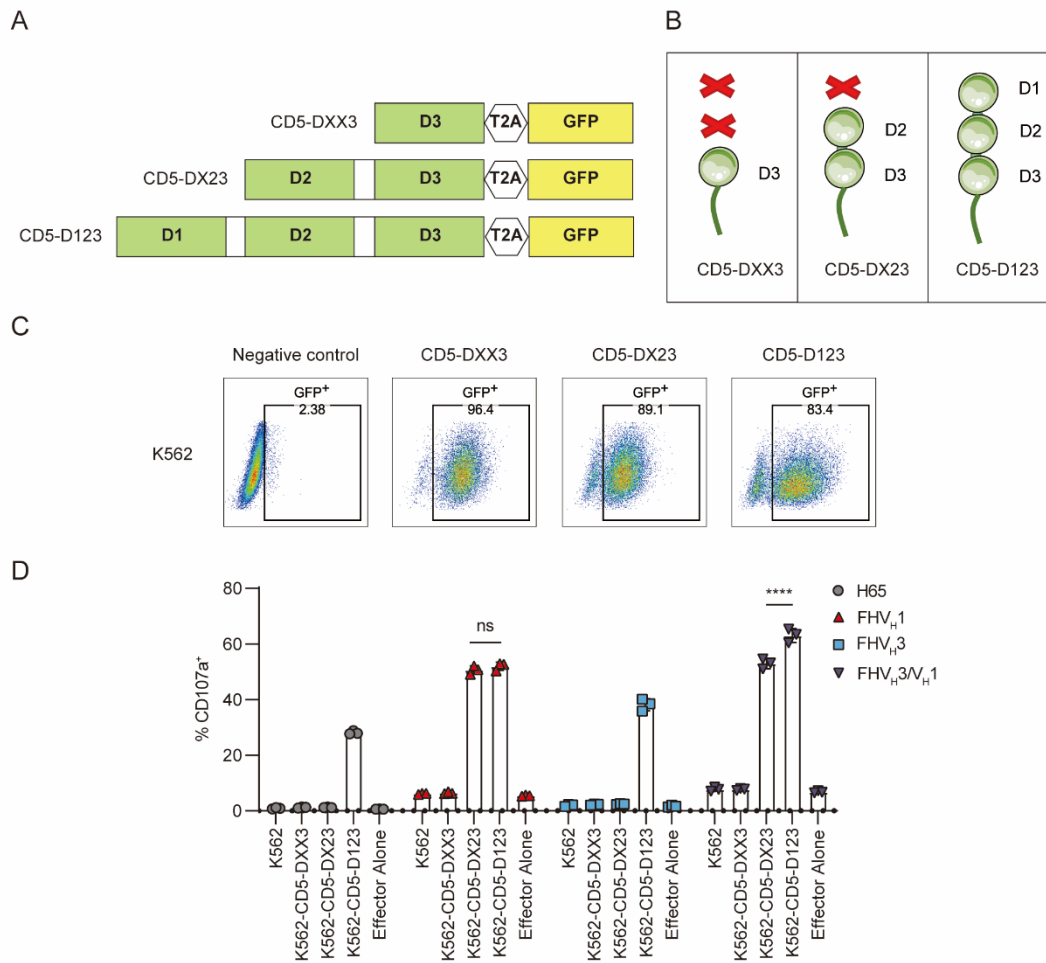

**Supplementary Figure 7. Epitope binding specificity of different anti-CD5 CAR constructs.** **A**, Design of vector constructs of wild-type and truncated CD5. The CD5 gene was linked to a GFP by T2A for further detection. **B**, Schematic diagram of wild-type CD5 and CD5 mutants. **C**, Representative results showed GFP expression of K562, K562-CD5-DXX3, K562-CD5-DX23, and K562-CD5-D123. **D**, Degranulation assay of four groups of CAR-T cells stimulated with K562 expressing wild-type and mutated CD5. H65, FHV<sub>H1</sub>, FHV<sub>H3</sub>, and FHV<sub>H3/V<sub>H1</sub></sub> CAR-T cells were incubated with K562, K562-CD5-DXX3, K562-CD5-DX23, and K562-CD5-D123, respectively. CD107a expression levels were detected after 4 h of incubation (gated

on EGFR<sup>+</sup>CD8<sup>+</sup> cells). The data represents mean  $\pm$  SD ( $n = 3$ ). Not significant (ns),

\*\*\*\* $P < 0.0001$  (two-way ANOVA).

**Supplementary Table 1. Phage protein panning.**

| Phage V <sub>H</sub><br>antibody library | Round | Strategy | Recovery rates | Enrichment |
|------------------------------------------|-------|----------|----------------|------------|
| SD-1                                     | 1st   | Protein  | 3.34E-05       | /          |
|                                          | 2nd   | Protein  | 7.74E-05       | 2.32       |
|                                          | 3rd   | Protein  | 4.54E-03       | 58.66      |
| NV <sub>H</sub>                          | 1st   | Protein  | 4.54E-05       | /          |
|                                          | 2nd   | Protein  | 7.46E-05       | 1.64       |
|                                          | 3rd   | Protein  | 1.20E-03       | 16.09      |
